# Supplementary material for: A Selective Histone Deacetylase Inhibitor Induces Autophagy and Cell Death via SCNN1A Downregulation in Glioblastoma Cells
Source: MDPI journal article supplement (doi:10.3390/cancers14184537), 2022-09-19

Figure S1. Annexin V staining of LMK235-treated cells

PI

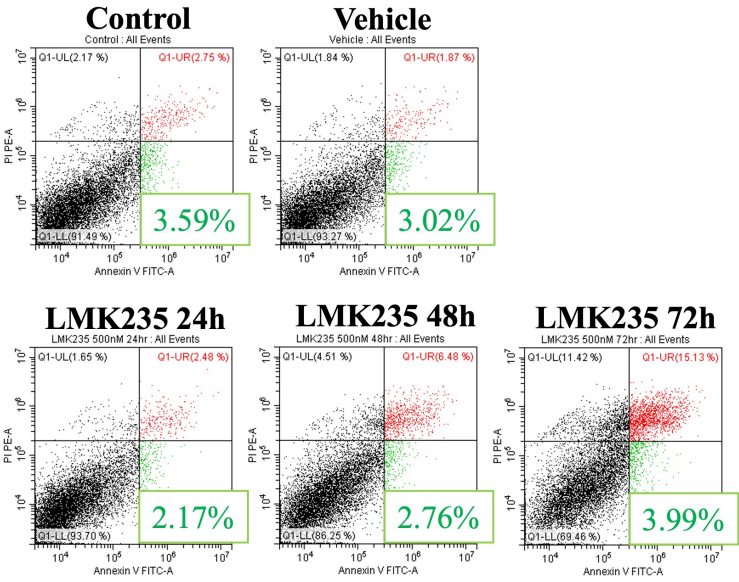

Annexin V

Figure S2. KEGG analysis of LMK235-treated cells

KEGG analysis (LMK235 0.5  $\mu$ M)

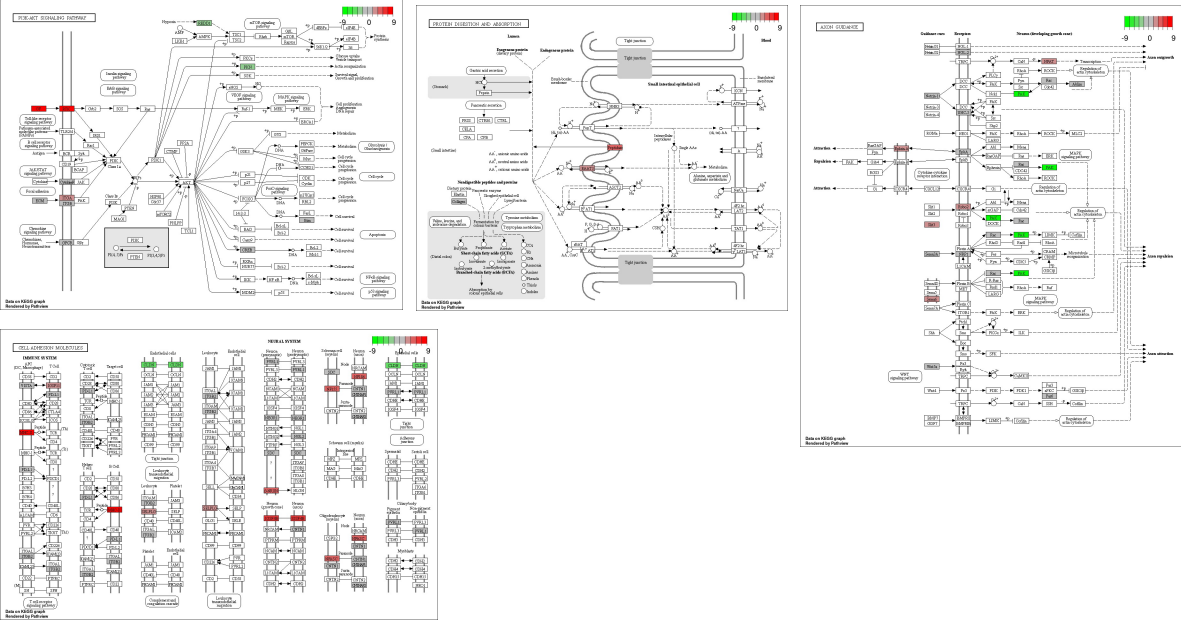

KEGG analysis (LMK235 2  $\mu$ M)

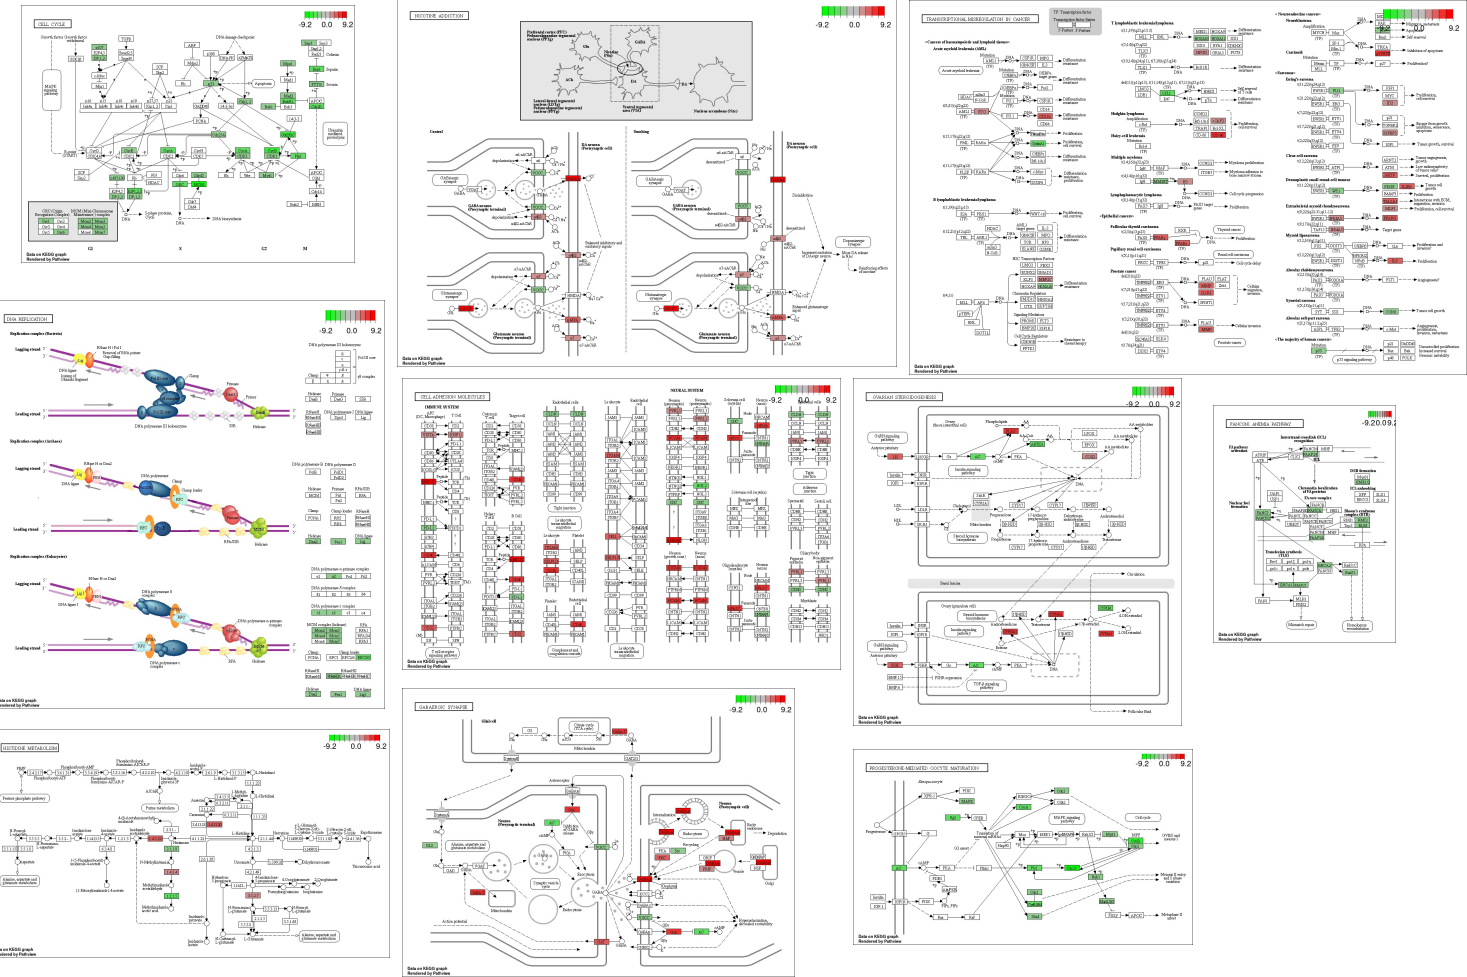

Supplement: s1 [file s1]
