# Supplementary material for: A Selective Histone Deacetylase Inhibitor Induces Autophagy and Cell Death via SCNN1A Downregulation in Glioblastoma Cells
Source: MDPI journal article supplement (doi:10.3390/cancers14184537), 2022-09-19

# Whole image of WB in Fig. 2A

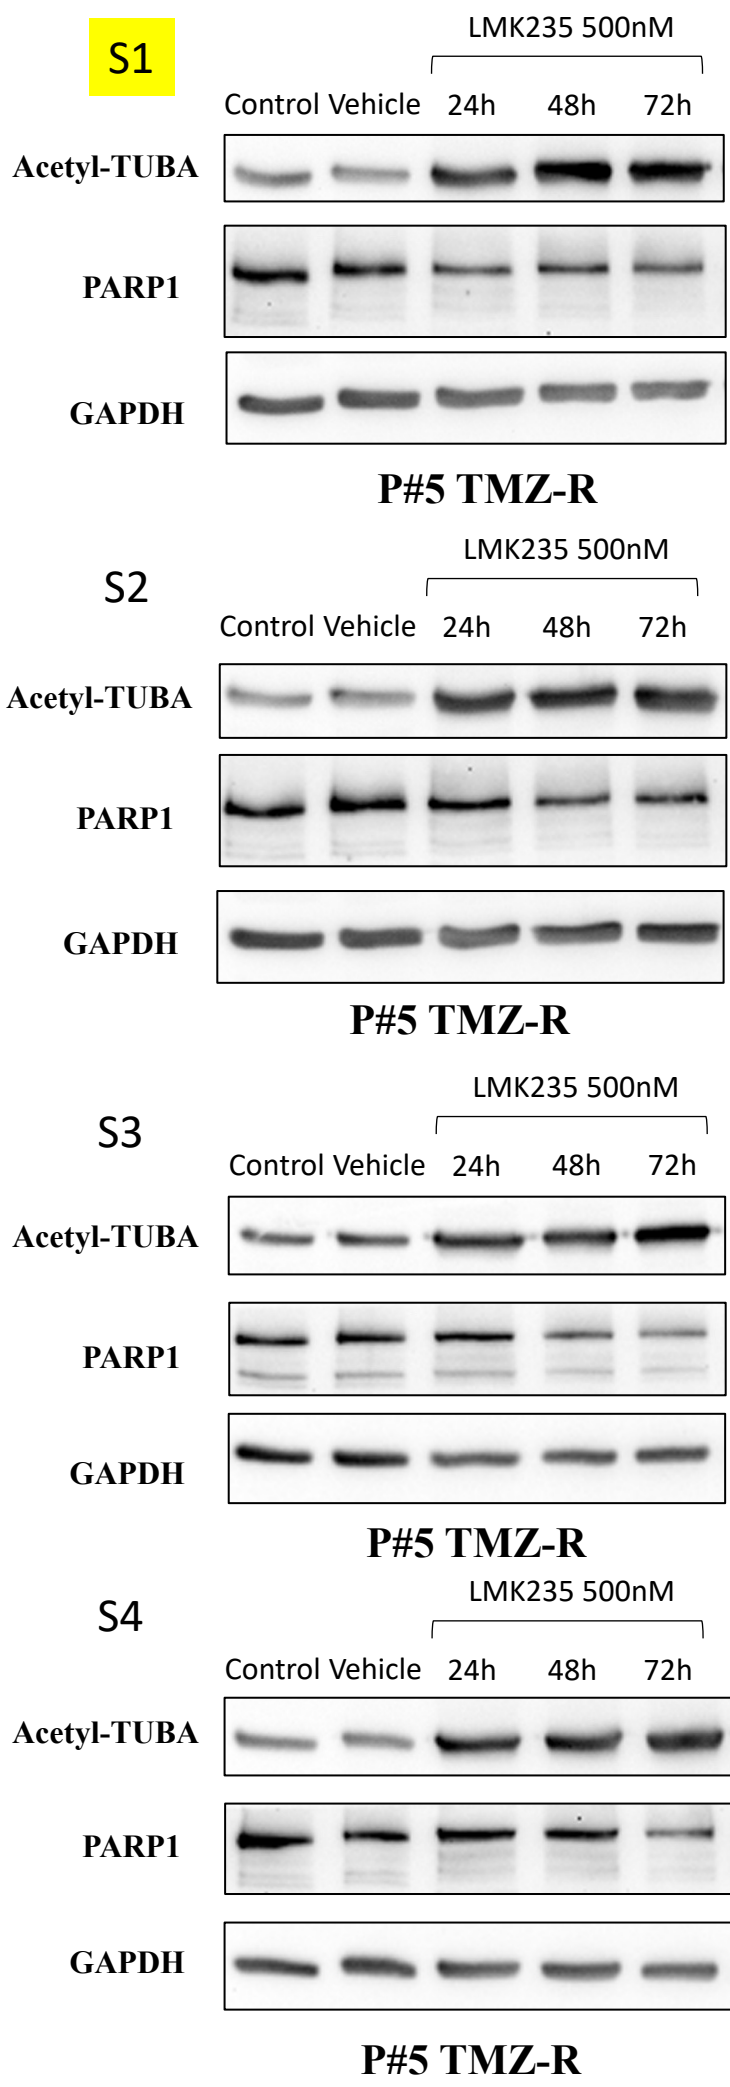

# Whole image of WB in Fig. 2D

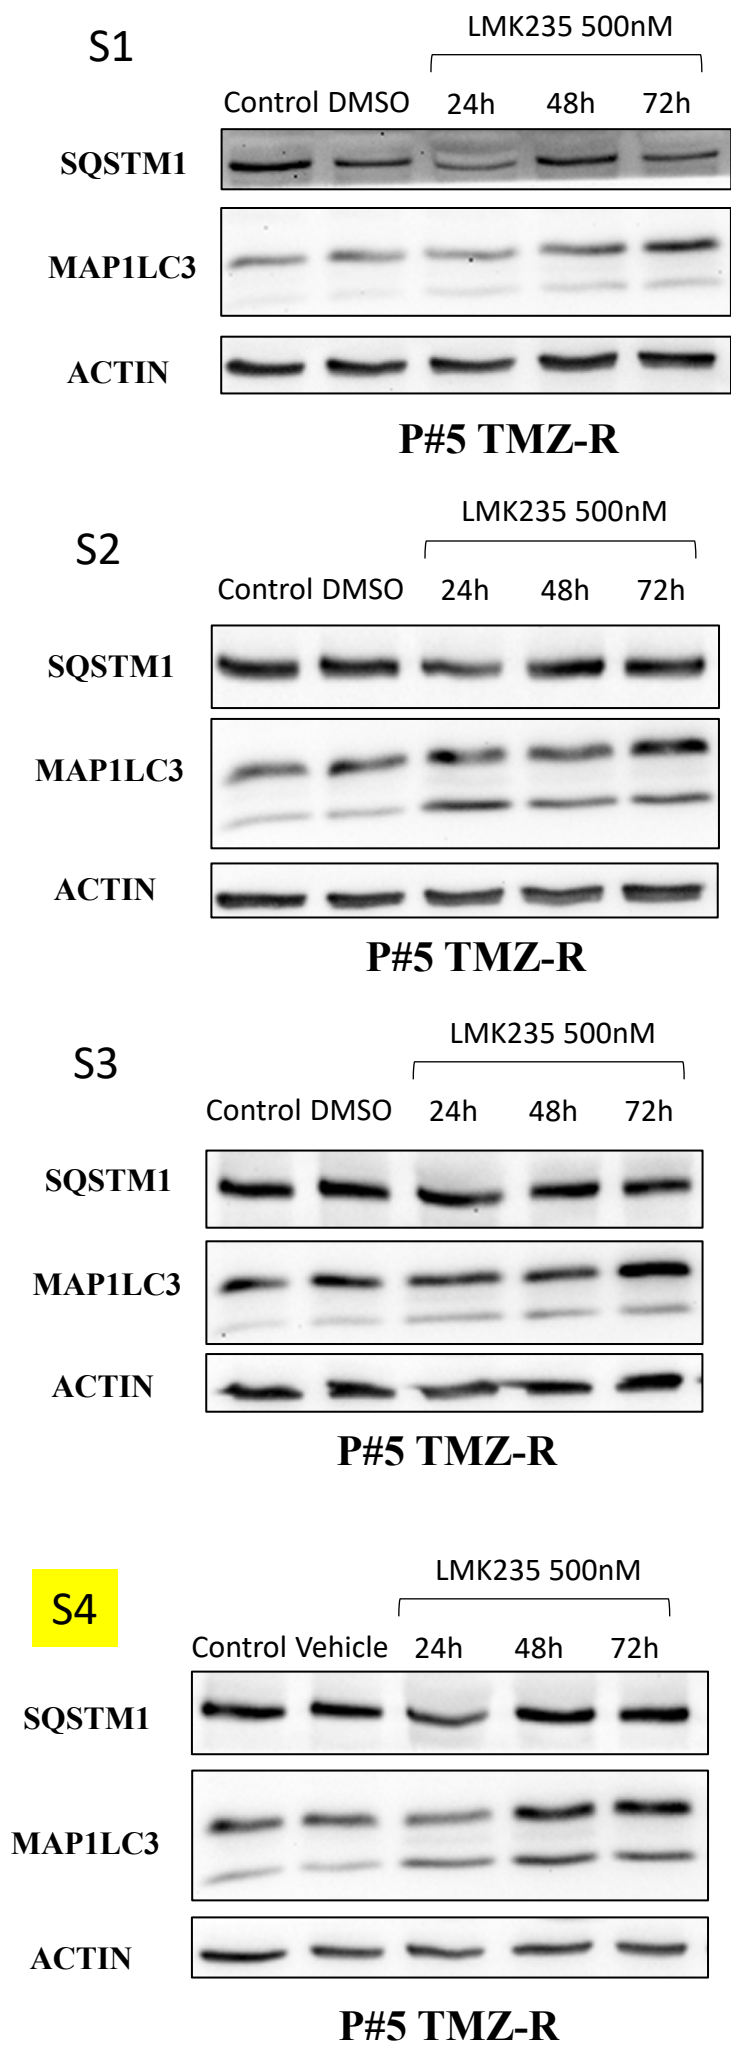

Whole image of WB in Fig. 5A

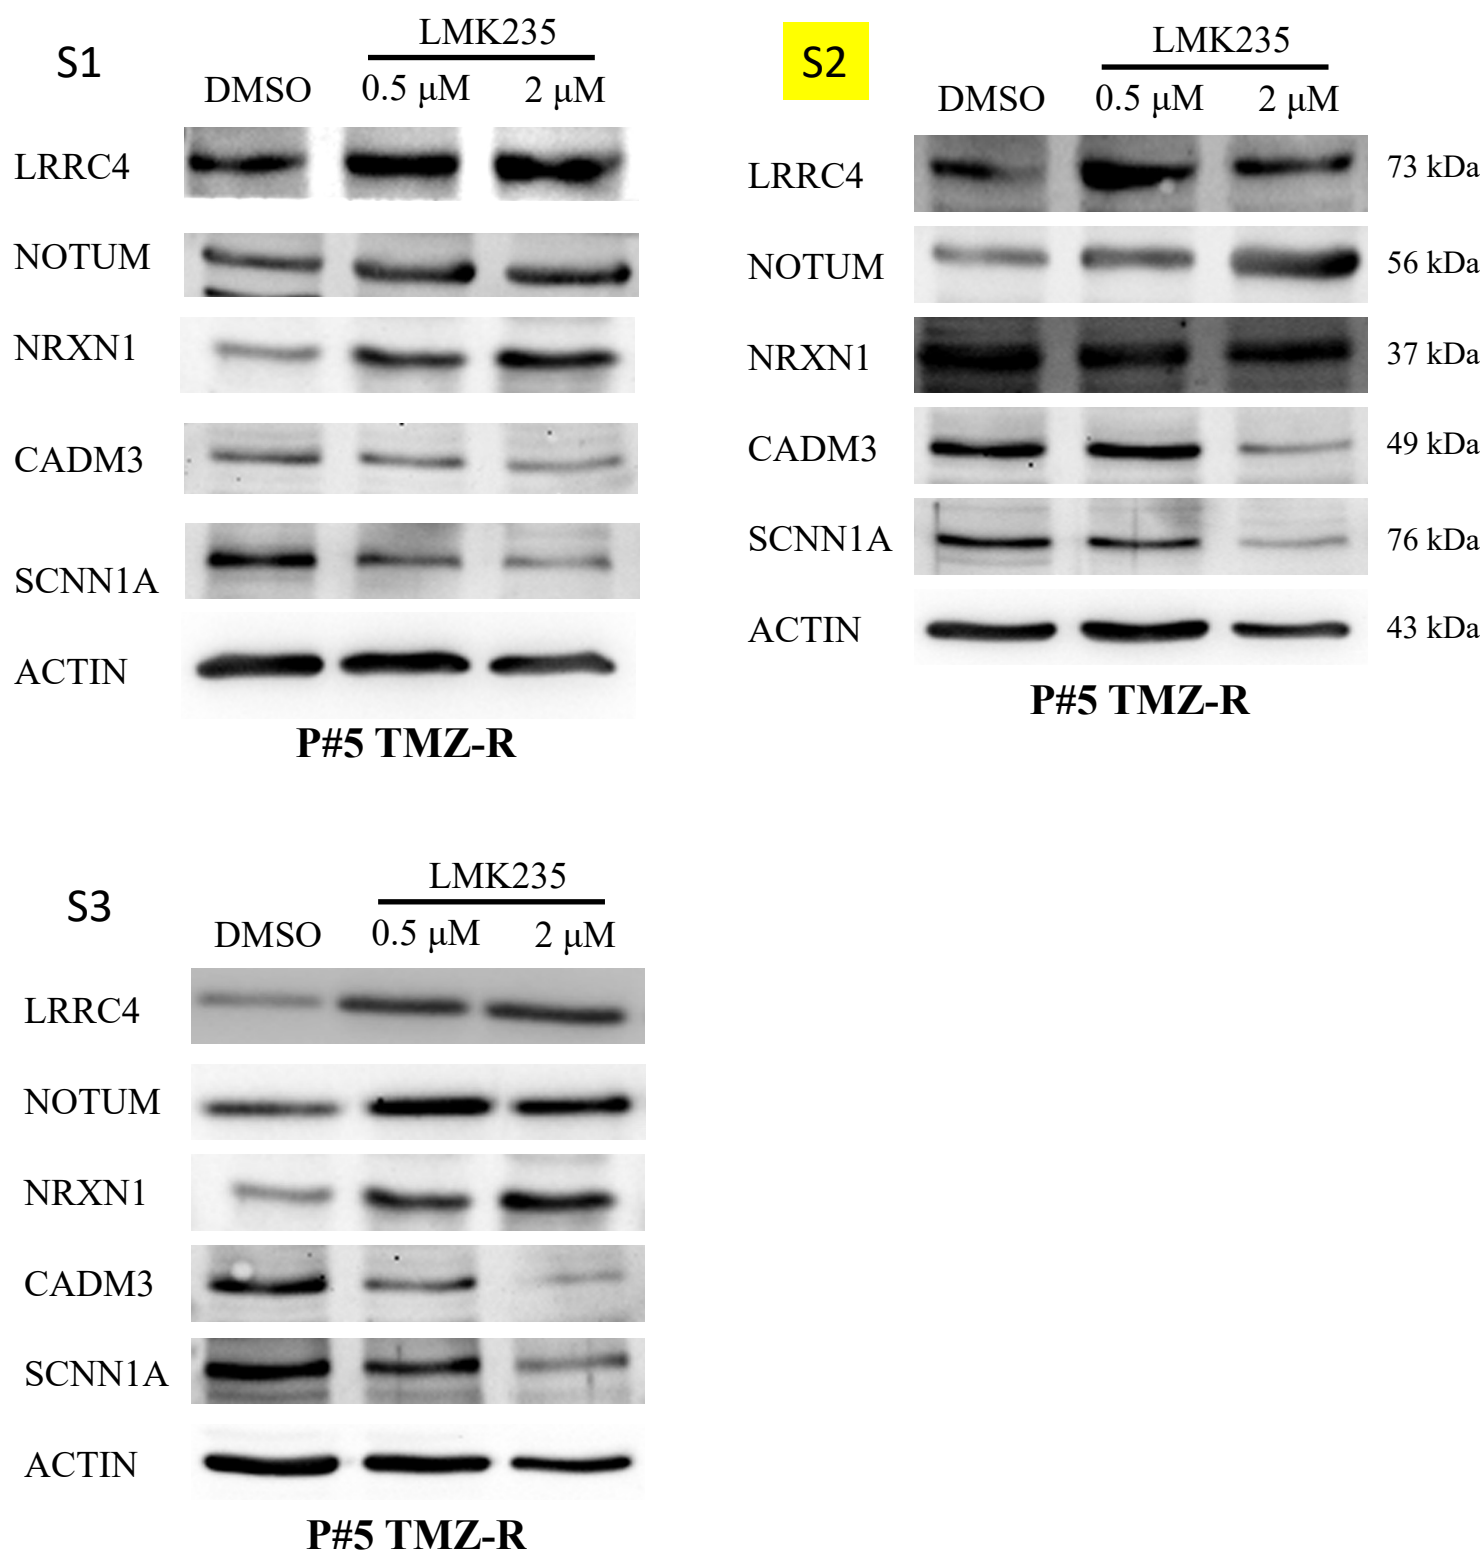

# Whole image of WB in Fig. 5D

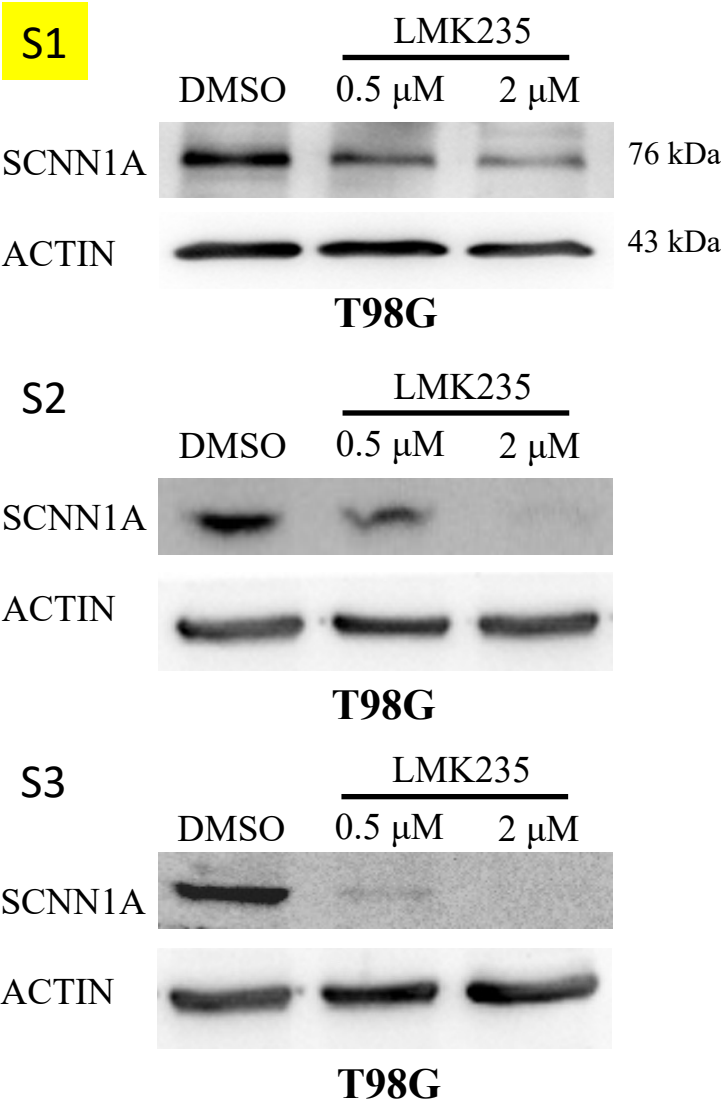

Whole image of WB in Fig. 5G

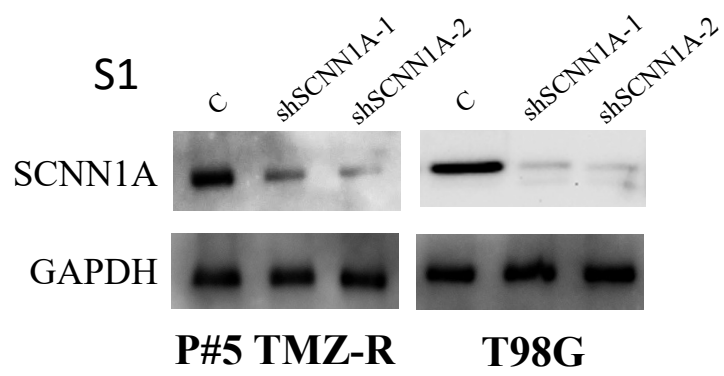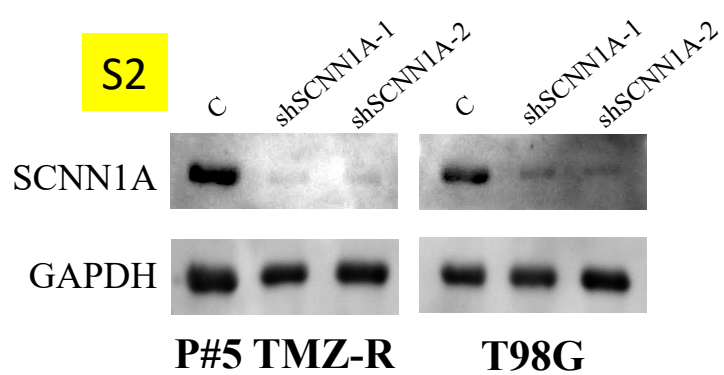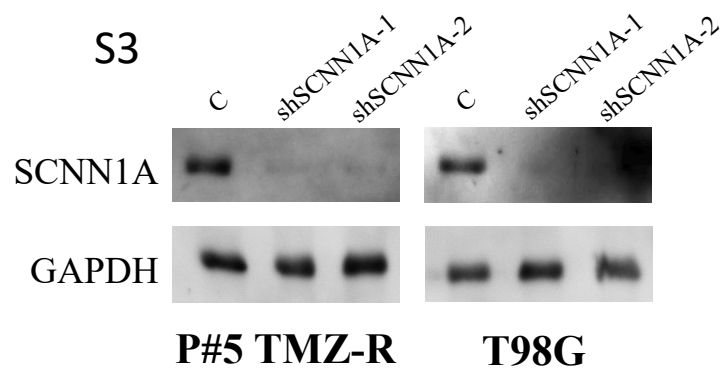

Supplement: s1 [file s1]
