# Supplementary material for: A Selective Histone Deacetylase Inhibitor Induces Autophagy and Cell Death via SCNN1A Downregulation in Glioblastoma Cells
Source: MDPI journal article supplement (doi:10.3390/cancers14184537), 2022-09-19
Supplement: s1 [file s1]

**Table S1.** Primers used in qPCR analysis.

| Gene Name |         | Sequence                 |
|-----------|---------|--------------------------|
| NFASC     | Forward | GGCAAAGCTGAAAACCAAGTCCG  |
|           | Reverse | TTCAGCCAGGAGACGGTGAGTT   |
| IGSF11    | Forward | CTACCTCCAACAGCTACTCAGG   |
|           | Reverse | CAGAAGACAGGTGCTGGTTCCA   |
| NRXN1     | Forward | GCTATCTTGGCAGGTCCTGTGA   |
|           | Reverse | ACATCCTCAGCCTCCGTATGCA   |
| SELPLG    | Forward | GAACCTGTCCACGGATTCAGCA   |
|           | Reverse | GTCAGTCGAGTTGTCTGTGCCT   |
| CADM3     | Forward | ATCCGGCACAAAGGAACCTAC    |
|           | Reverse | CGCCTTCTGCATTGATGATG     |
| HLA-DMB   | Forward | CACTTACACCTGTGTGGTAGAGC  |
|           | Reverse | GCAGACACAGAAACCTTCAGGG   |
| HLA-DMA   | Forward | GTTCTGCGAGTGGATGATCCAG   |
|           | Reverse | TGTTGGGCTTGCCAAACTCCAG   |
| LRRC4     | Forward | CGTGAAGTGGTTGCTGCCCAAT   |
|           | Reverse | GTTGCCTGCAACATTGGTCACC   |
| NECTIN1   | Forward | CTACCACATGGACCGCTTCAAG   |
|           | Reverse | CTTTGCAGGTGAGCTTCACGTC   |
| CNTNAP1   | Forward | GCCTTGTACTGCAACTGTGACG   |
|           | Reverse | CTCAGAAAGTGGAGCGGTTTCGTA |
| VSIR      | Forward | AGATGCACCATCCAACCTGTGTGG |
|           | Reverse | AGGCAGAGGATTCTACGATGC    |
| CLDN3     | Forward | GCCTTCATCGGCAGCAACATCA   |
|           | Reverse | AGCGAGTCGTACACCTTGCACT   |
| STAT5A    | Forward | G TTCAGTGTGGCAGCAATGAGC  |
|           | Reverse | AGCACAGTAGCCGTGGCATTGT   |
| IL27RA    | Forward | GTGTGGGTATCAGGGAACCTCT   |
|           | Reverse | TCCTTCTGGACTCAGCTCACGA   |
| PDGFB     | Forward | GAGATGCTGAGTGACCACTCGA   |
|           | Reverse | GTCATGTTCAAGTCCAACCTCGG  |
| COL9A3    | Forward | GAGTCCTCCCTGAAGGCGCTA    |
|           | Reverse | CTGCTCGCCTTTGTAGCCAGTG   |
| MATN1     | Forward | GGCTTCACTCTGAACAGCGACG   |
|           | Reverse | CCGTCAATGAGGAAGACCAGGT   |
| SCNN1A    | Forward | GTGCCTACATCTTCTATCCGCG   |
|           | Reverse | GTCTGAGGAGAAAGTCAACCTGG  |
| ANO1      | Forward | GAAGCGGAAACAGATGCGACTC   |
|           | Reverse | CTGGCTTCGTATTCAGCTCTAGG  |
| RTEL1     | Forward | CCTATCCTGTCATGGAGAAGAGC  |
|           | Reverse | TCTCGGAGAAGCTGCCTTTGCT   |
| GPER1     | Forward | TTCCGCGAGAAGATGACCATCC   |
|           | Reverse | TAGTACCGCTCGTGCAGGTTGA   |
| ADORA1    | Forward | ATTGCTGTGGACCGCTACCTCC   |
|           | Reverse | CGCACTCAGATTGTTCCAGCCA   |
| NOTUM     | Forward | CTACTGGTGGAACGCAAACATGG  |
|           | Reverse | CGCACCACCTCCTGGATGATG    |

| Gene Name |         | Sequence                 |
|-----------|---------|--------------------------|
| FAM20C    | Forward | CTGACTACTGCGAGGAGGTGAA   |
|           | Reverse | TCTCGTAGTGGTGACGGTCCAT   |
| NTS       | Forward | CAGCAGGGCTTTTCAACACTGG   |
|           | Reverse | CTCATACAGCTGCCGTTTCAGAA  |
| GUCY2C    | Forward | CAATCCAGAGACTACGACAGTGC  |
|           | Reverse | TGTGCCGTAGAACTTGGTCAGG   |
| CD53      | Forward | GCTATGCGAAAGCAAGACTGTGG  |
|           | Reverse | GTCAATCTGGCAGTTCAGGGTC   |
| NCKAP1L   | Forward | TCTGTGCTGAGCAGCGAAACCT   |
|           | Reverse | TGACTCTCAGCTCCTGGCTTGT   |
| SCN1A     | Forward | GGACTGTATGGAGGTTGCTGGT   |
|           | Reverse | GCAAGGTTGTCTGCACTAAATGAG |
| AGT       | Forward | TGGACAGCACCTGGCTTTCAA    |
|           | Reverse | ACACTGAGGTGCTGTTGTCCAC   |
| TCEAL5    | Forward | GACAGAATGCGAGGGAAAGCGA   |
|           | Reverse | TGTGGCTTGTCTCACCTTCAG    |
| BEX5      | Forward | TGGTGAATACCAGGAGCCTGGA   |
|           | Reverse | CATCTCCTCCATGAACCGTTCC   |
| CGA       | Forward | TCCATTCCGCTCCTGATGTGCA   |
|           | Reverse | CGTCTTCTTGGACCTTAGTGGAG  |
| ACTIN     | Forward | GAGACCTTCAACACCCCAGC     |
|           | Reverse | ATGTCACGCACGATTTCCC      |
